# Supplementary material for: Seroprevalence and Risk Factors Associated with Chlamydia abortus Infection in Sheep and Goats in Eastern Saudi Arabia
Source: MDPI journal article supplement (doi:10.3390/pathogens10040489), 2021-04-17
Supplement: s1 [file s1]

**Table S1.** Description and categories of the collected variables.

| Factors                                        | Sheep           |           |      | Goats        |           |      |
|------------------------------------------------|-----------------|-----------|------|--------------|-----------|------|
|                                                | Categories      | Frequency | %    | Categories   | Frequency | %    |
| <b>Age</b>                                     |                 |           |      |              |           |      |
|                                                | <1.4 year       | 448       | 26.1 | ≤2 year      | 564       | 51.2 |
|                                                | 1.4 – 2.8 years | 876       | 51.0 | >2 year      | 537       | 48.8 |
|                                                | ≥ 2.8 years     | 393       | 22.9 |              |           |      |
| <b>Sex</b>                                     |                 |           |      |              |           |      |
|                                                | Male            | 127       | 7.4  | Male         | 176       | 16.0 |
|                                                | Female          | 1590      | 92.6 | Female       | 925       | 84.0 |
| <b>Breed</b>                                   |                 |           |      |              |           |      |
|                                                | Awassi (Naeimi) | 689       | 40.1 | Aradi        | 459       | 41.7 |
|                                                | Najdi           | 452       | 26.3 | Damascus     | 301       | 27.3 |
|                                                | Sawakin         | 181       | 10.5 | Mixed        | 341       | 31.0 |
|                                                | Mixed           | 395       | 23.1 |              |           |      |
| <b>Flock size</b>                              |                 |           |      |              |           |      |
|                                                | Small (≤200)    | 494       | 28.8 | Small (≤200) | 328       | 29.8 |
|                                                | Large (>200)    | 1223      | 71.2 | Large (>200) | 773       | 70.2 |
| <b>Season</b>                                  |                 |           |      |              |           |      |
|                                                | Summer          | 322       | 18.7 | Summer       | 140       | 12.7 |
|                                                | Winter          | 710       | 41.4 | Winter       | 524       | 47.6 |
|                                                | Spring          | 400       | 23.3 | Spring       | 236       | 21.4 |
|                                                | Autumn          | 285       | 16.6 | Autumn       | 201       | 18.3 |
| <b>Recent history of abortion</b>              |                 |           |      |              |           |      |
|                                                | No              | 1470      | 85.6 | No           | 1075      | 97.7 |
|                                                | Yes             | 247       | 14.4 | Yes          | 26        | 2.3  |
| <b>Introductions of new sheep to the flock</b> |                 |           |      |              |           |      |
|                                                | No              | 1054      | 61.4 | No           | 888       | 80.7 |
|                                                | Yes             | 663       | 38.6 | Yes          | 213       | 19.4 |
| <b>Mixed breeding farm</b>                     |                 |           |      |              |           |      |
|                                                | No              | 1421      | 82.8 | No           | 818       | 74.3 |
|                                                | Yes             | 296       | 17.2 | Yes          | 283       | 25.7 |
| <b>Farm hygiene</b>                            |                 |           |      |              |           |      |
|                                                | Bad             | 1475      | 85.9 | Bad          | 769       | 69.9 |
|                                                | Good            | 242       | 14.1 | Good         | 332       | 30.2 |

|                                       |             |      |                      |             |      |
|---------------------------------------|-------------|------|----------------------|-------------|------|
| <b>History of previous treatment</b>  |             |      |                      |             |      |
| No                                    | 1468        | 85.5 | No                   | 1070        | 97.2 |
| Yes                                   | 249         | 14.5 | Yes                  | 31          | 2.8  |
| <b>Type of breeding system</b>        |             |      |                      |             |      |
| Closed                                | 850         | 49.5 | Closed               | 1002        | 91.0 |
| Open                                  | 867         | 50.5 | Open                 | 99          | 9.0  |
| <b>Sheep exchange during breeding</b> |             |      |                      |             |      |
| No                                    | 567         | 33.0 | No                   | 421         | 38.3 |
| Female out                            | 295         | 17.2 | Female out           | 290         | 26.3 |
| Female in                             | 855         | 49.8 | Female in            | 390         | 35.4 |
| <b>Vaccine type</b>                   |             |      |                      |             |      |
| Clostridia (C) only                   | 240         | 14.0 | Clostridia (C) only  | 133         | 12.1 |
| Pasteurella (P) only                  | 158         | 9.2  | Pasteurella (P) only | 99          | 9.0  |
| C + P                                 | 589         | 34.3 | C + P                | 164         | 14.9 |
| C + P + PPR                           | 730         | 42.5 | C + P + PPR          | 705         | 64.0 |
| <b>Total</b>                          | <b>1717</b> |      |                      | <b>1101</b> |      |
